# Supplementary material
Source: HighWire-hosted journal article supplement (https://erj.ersjournals.com/content/55/2/2000028)
Supplement: inline-supplementary-material-1 [file inline-supplementary-material-1.pdf]

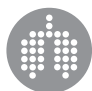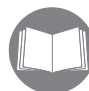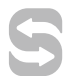

SHAREABLE PDF

# Incidental venous thromboembolism, detected by chance, but still venous thromboembolism

Guy Meyer and Benjamin Planquette

**Affiliation:** Division of Respiratory Disease, APHP Centre, Université Paris Descartes, Université de Paris, Paris, France.

**Correspondence:** Guy Meyer, Service de Pneumologie, Hôpital Européen Georges Pompidou, 20 rue Leblanc, 75015 Paris, France. E-mail: [guy.meyer@aphp.fr](mailto:guy.meyer@aphp.fr)

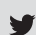

@ERSpublications

**Incidental venous thromboembolism and clinically suspected venous thromboembolism should receive the same anticoagulant treatment** <http://bit.ly/2NQ4l8U>

**Cite this article as:** Meyer G, Planquette B. Incidental venous thromboembolism, detected by chance, but still venous thromboembolism. *Eur Respir J* 2020; 55: 2000028 [<https://doi.org/10.1183/13993003.00028-2020>].

This single-page version can be shared freely online.

Incidental venous thromboembolism (VTE) refers to deep venous thrombosis or pulmonary embolism (PE) diagnosed on an imaging test, usually computed tomography, performed for another reason than the clinical suspicion of VTE. Incidental VTE is particularly frequent in patients with cancer who have an increased risk of VTE and who underwent frequent imaging tests for staging purposes and assessment of anticancer treatment.
